# Supplementary material for: Embedding of Molecular Structure Using Molecular Hypergraph Variational Autoencoder with Metric Learning
Source: PubMed Central journal article supplement (PMC7900996; doi:10.1002/minf.202000203), 2020-11-23
Supplement: MINF-40-2000203-s001.pdf [file MINF-40-2000203-s001.pdf]

# molecular informatics

Supporting Information

## **Embedding of Molecular Structure Using Molecular Hypergraph Variational Autoencoder with Metric Learning**

Daiki Koge, Naoaki Ono,\* Ming Huang, Md. Altaf-Ul-Amin, and Shigehiko Kanaya©2020 The Authors. Published by Wiley-VCH GmbH. This is an open access article under the terms of the Creative Commons Attribution License, which permits use, distribution and reproduction in any medium, provided the original work is properly cited.

# Supporting information for

## Embedding of Molecular Structure Using Molecular Hypergraph Variational Autoencoder with Metric Learning

Daiki Koge, Naoaki Ono\* , Ming Huang, Md. Altaf-UI-Amin and Shigehiko Kanaya

Corresponding author e-mail : [nono@is.naist.jp](mailto:nono@is.naist.jp)

### ■ Section 1. All 83 properties of RDKit descriptors.

MaxEStateIndex

MinEStateIndex

MaxAbsEStateIndex

MinAbsEStateIndex

qed

MolWt

HeavyAtomMolWt

ExactMolWt

MaxPartialCharge

MinPartialCharge

MaxAbsPartialCharge

MinAbsPartialCharge

FpDensityMorgan1

FpDensityMorgan2

FpDensityMorgan3

BalabanJ

BertzCT

Chi0

Chi0n

Chi0v

Chi1

Chi1n

Chi1v

Chi2n

Chi2v

Chi3n

Chi3v  
Chi4n  
Chi4v  
HallKierAlpha  
Ipc  
Kappa1  
Kappa2  
Kappa3  
LabuteASA  
PEOE\_VSA1  
PEOE\_VSA10  
PEOE\_VSA11  
PEOE\_VSA12  
PEOE\_VSA13  
PEOE\_VSA14  
PEOE\_VSA2  
PEOE\_VSA3  
PEOE\_VSA4  
PEOE\_VSA5  
PEOE\_VSA6  
PEOE\_VSA7  
PEOE\_VSA8  
PEOE\_VSA9  
SMR\_VSA1  
SMR\_VSA10  
SMR\_VSA2  
SMR\_VSA3  
SMR\_VSA4  
SMR\_VSA5  
SMR\_VSA6  
SMR\_VSA7  
SMR\_VSA9  
SlogP\_VSA1  
SlogP\_VSA10  
SlogP\_VSA11  
SlogP\_VSA2

SlogP\_VSA3  
 SlogP\_VSA4  
 SlogP\_VSA5  
 SlogP\_VSA6  
 SlogP\_VSA8  
 TPSA  
 EState\_VSA1  
 EState\_VSA10  
 EState\_VSA2  
 EState\_VSA3  
 EState\_VSA4  
 EState\_VSA5  
 EState\_VSA6  
 EState\_VSA7  
 EState\_VSA8  
 EState\_VSA9  
 VSA\_EState8  
 VSA\_EState9  
 FractionCSP3  
 MolLogP  
 MolMR

- Section 2. RMSD, MAE or R2 prediction powers for each of the calculated properties.

For QM9 properties.

**Table S1.** Comparison of MSE with the models for QM9 data sets. The numbers highlighted in bold show that the model is better. The label indicates the physical property used for embedding learning. Joint and Metric represent the existing and proposed methods, respectively

| Label          | Model  | $\mu$                       | $\alpha$                    | HOMO                         | LUMO                         | $\Delta\epsilon$             | ZPVE                         | R <sup>2</sup>              | U <sub>0</sub>              | C <sub>v</sub>              |
|----------------|--------|-----------------------------|-----------------------------|------------------------------|------------------------------|------------------------------|------------------------------|-----------------------------|-----------------------------|-----------------------------|
| U <sub>0</sub> | Joint  | <b>1.679×10<sup>0</sup></b> | 1.611×10 <sup>1</sup>       | 2.477×10 <sup>-4</sup>       | <b>4.159×10<sup>-4</sup></b> | <b>6.713×10<sup>-4</sup></b> | 1.067×10 <sup>-4</sup>       | 9.564×10 <sup>3</sup>       | 1.534×10 <sup>2</sup>       | 2.769×10 <sup>0</sup>       |
|                | Metric | 1.851×10 <sup>0</sup>       | <b>7.661×10<sup>0</sup></b> | <b>2.005×10<sup>-4</sup></b> | 4.822×10 <sup>-4</sup>       | 7.293×10 <sup>-4</sup>       | <b>9.334×10<sup>-5</sup></b> | <b>8.328×10<sup>3</sup></b> | <b>6.581×10<sup>1</sup></b> | <b>1.747×10<sup>0</sup></b> |
| C <sub>v</sub> | Joint  | <b>1.838×10<sup>0</sup></b> | 9.846×10 <sup>0</sup>       | <b>2.023×10<sup>-4</sup></b> | 3.461×10 <sup>-4</sup>       | 5.455×10 <sup>-4</sup>       | 9.458×10 <sup>-5</sup>       | <b>7.096×10<sup>3</sup></b> | 1.934×10 <sup>2</sup>       | <b>1.255×10<sup>0</sup></b> |
|                | Metric | 1.850×10 <sup>0</sup>       | <b>8.495×10<sup>0</sup></b> | 2.263×10 <sup>-4</sup>       | <b>2.708×10<sup>-4</sup></b> | <b>4.638×10<sup>-4</sup></b> | <b>6.743×10<sup>-5</sup></b> | 8.446×10 <sup>3</sup>       | <b>1.815×10<sup>2</sup></b> | 1.340×10 <sup>0</sup>       |
| HOMO           | Joint  | 1.939×10 <sup>0</sup>       | 1.086×10 <sup>1</sup>       | 1.746×10 <sup>-4</sup>       | 3.523×10 <sup>-4</sup>       | 4.266×10 <sup>-4</sup>       | 9.416×10 <sup>-5</sup>       | <b>7.022×10<sup>3</sup></b> | 2.242×10 <sup>2</sup>       | 1.780×10 <sup>0</sup>       |
|                | Metric | <b>1.277×10<sup>0</sup></b> | <b>1.034×10<sup>1</sup></b> | <b>1.131×10<sup>-4</sup></b> | <b>2.563×10<sup>-4</sup></b> | <b>3.620×10<sup>-4</sup></b> | <b>9.273×10<sup>-5</sup></b> | 8.216×10 <sup>3</sup>       | <b>1.633×10<sup>2</sup></b> | <b>1.274×10<sup>0</sup></b> |

**Table S2.** Comparison of MSE with the models for QM9 data sets.

| Label | Model  | $\mu$                                | $\alpha$                             | HOMO                                    | LUMO                                    | $\Delta\varepsilon$                     | ZPVE                                    | $R^2$                                | $U_0$                                | $C_v$                                |
|-------|--------|--------------------------------------|--------------------------------------|-----------------------------------------|-----------------------------------------|-----------------------------------------|-----------------------------------------|--------------------------------------|--------------------------------------|--------------------------------------|
| $U_0$ | Joint  | <b><math>1.296\times 10^0</math></b> | $4.014\times 10^0$                   | $1.574\times 10^{-2}$                   | <b><math>2.039\times 10^{-2}</math></b> | <b><math>2.591\times 10^{-2}</math></b> | $1.033\times 10^{-2}$                   | $9.780\times 10^1$                   | $1.238\times 10^1$                   | $1.664\times 10^0$                   |
|       | Metric | $1.361\times 10^0$                   | <b><math>2.768\times 10^0</math></b> | <b><math>1.416\times 10^{-2}</math></b> | $2.196\times 10^{-2}$                   | $2.701\times 10^{-2}$                   | <b><math>9.661\times 10^{-3}</math></b> | <b><math>9.126\times 10^1</math></b> | <b><math>8.113\times 10^0</math></b> | <b><math>1.322\times 10^0</math></b> |
| $C_v$ | Joint  | <b><math>1.356\times 10^0</math></b> | $3.138\times 10^0$                   | <b><math>1.422\times 10^{-2}</math></b> | $1.860\times 10^{-2}$                   | $2.336\times 10^{-2}$                   | $9.725\times 10^{-3}$                   | <b><math>8.424\times 10^1</math></b> | $1.391\times 10^1$                   | <b><math>1.120\times 10^0</math></b> |
|       | Metric | $1.360\times 10^0$                   | <b><math>2.915\times 10^0</math></b> | $1.504\times 10^{-2}$                   | <b><math>1.645\times 10^{-2}</math></b> | <b><math>2.154\times 10^{-2}</math></b> | <b><math>8.211\times 10^{-3}</math></b> | $9.190\times 10^1$                   | <b><math>1.347\times 10^1</math></b> | $1.158\times 10^0$                   |
| HOMO  | Joint  | $1.393\times 10^0$                   | $3.296\times 10^0$                   | $1.321\times 10^{-2}$                   | $1.877\times 10^{-2}$                   | $2.065\times 10^{-2}$                   | $9.704\times 10^{-3}$                   | <b><math>8.380\times 10^1</math></b> | $1.497\times 10^1$                   | $1.334\times 10^0$                   |
|       | Metric | <b><math>1.130\times 10^0</math></b> | <b><math>3.216\times 10^0</math></b> | <b><math>1.064\times 10^{-2}</math></b> | <b><math>1.601\times 10^{-2}</math></b> | <b><math>1.903\times 10^{-2}</math></b> | <b><math>9.630\times 10^{-3}</math></b> | $9.064\times 10^1$                   | <b><math>1.278\times 10^1</math></b> | <b><math>1.129\times 10^0</math></b> |

**Table S3.** Comparison of R2 with the models for QM9 data sets.

| Label | Model  | $\mu$                                   | $\alpha$                                | HOMO                                    | LUMO                                    | $\Delta\varepsilon$                     | ZPVE                                    | $R^2$                                   | $U_0$                                   | $C_v$                                   |
|-------|--------|-----------------------------------------|-----------------------------------------|-----------------------------------------|-----------------------------------------|-----------------------------------------|-----------------------------------------|-----------------------------------------|-----------------------------------------|-----------------------------------------|
| $U_0$ | Joint  | <b><math>6.173\times 10^{-2}</math></b> | $7.303\times 10^{-1}$                   | $5.000\times 10^{-1}$                   | <b><math>7.675\times 10^{-1}</math></b> | <b><math>6.432\times 10^{-1}</math></b> | $8.816\times 10^{-1}$                   | $8.739\times 10^{-1}$                   | $8.991\times 10^{-1}$                   | $8.140\times 10^{-1}$                   |
|       | Metric | $1.932\times 10^{-2}$                   | <b><math>8.647\times 10^{-1}</math></b> | <b><math>5.182\times 10^{-1}</math></b> | $7.346\times 10^{-1}$                   | $6.245\times 10^{-1}$                   | <b><math>8.893\times 10^{-1}</math></b> | <b><math>8.784\times 10^{-1}</math></b> | <b><math>9.555\times 10^{-1}</math></b> | <b><math>8.661\times 10^{-1}</math></b> |
| $C_v$ | Joint  | <b><math>1.241\times 10^{-1}</math></b> | $8.076\times 10^{-1}$                   | <b><math>5.453\times 10^{-1}</math></b> | $8.085\times 10^{-1}$                   | $7.335\times 10^{-1}$                   | $8.875\times 10^{-1}$                   | <b><math>8.875\times 10^{-1}</math></b> | $8.487\times 10^{-1}$                   | $9.083\times 10^{-1}$                   |
|       | Metric | $6.907\times 10^{-2}$                   | <b><math>8.466\times 10^{-1}</math></b> | $5.384\times 10^{-1}$                   | <b><math>8.496\times 10^{-1}</math></b> | <b><math>7.613\times 10^{-1}</math></b> | <b><math>9.265\times 10^{-1}</math></b> | $8.857\times 10^{-1}$                   | <b><math>8.615\times 10^{-1}</math></b> | <b><math>9.098\times 10^{-1}</math></b> |
| HOMO  | Joint  | $4.928\times 10^{-3}$                   | $7.875\times 10^{-1}$                   | $5.764\times 10^{-1}$                   | $8.079\times 10^{-1}$                   | $7.737\times 10^{-1}$                   | <b><math>8.899\times 10^{-1}</math></b> | <b><math>9.005\times 10^{-1}</math></b> | $8.252\times 10^{-1}$                   | $8.695\times 10^{-1}$                   |
|       | Metric | <b><math>2.674\times 10^{-1}</math></b> | <b><math>8.037\times 10^{-1}</math></b> | <b><math>7.425\times 10^{-1}</math></b> | <b><math>8.580\times 10^{-1}</math></b> | <b><math>8.031\times 10^{-1}</math></b> | $8.895\times 10^{-1}$                   | $8.804\times 10^{-1}$                   | <b><math>8.681\times 10^{-1}</math></b> | <b><math>9.010\times 10^{-1}</math></b> |

For RDKit Descriptors.

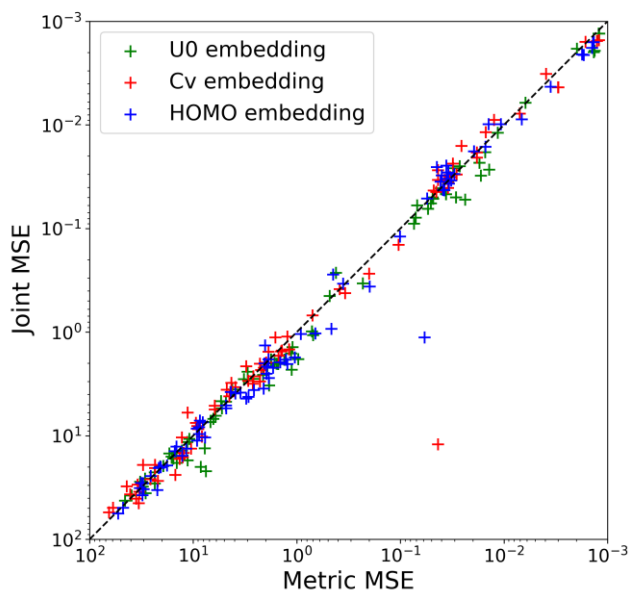**Figure S1.** MSE score comparison of Joint and Metric VAEs (our proposed model) broken down by RDKit descriptors and embedding labels. Each dot represents RDKit descriptors, while each marker color represents a physical property value used in the embedding learning model.

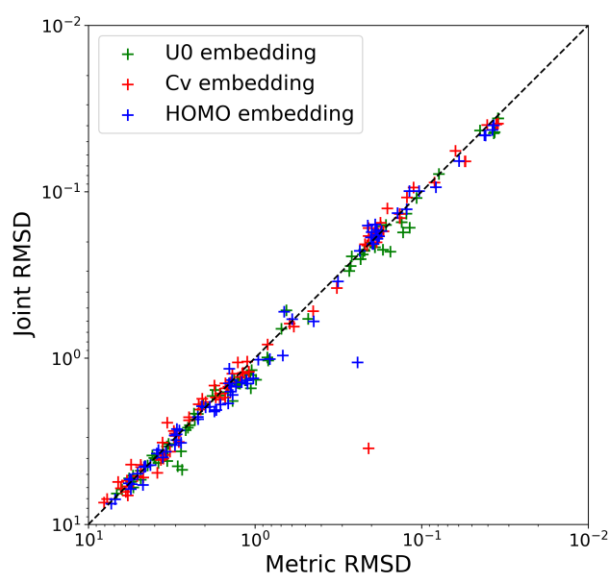

**Figure S2.** RMSD score comparison of Joint and Metric VAEs (our proposed model) broken down by RDKit descriptors and embedding labels. Each dot represents RDKit descriptors, while each marker color represents a physical property value used in the embedding learning model.

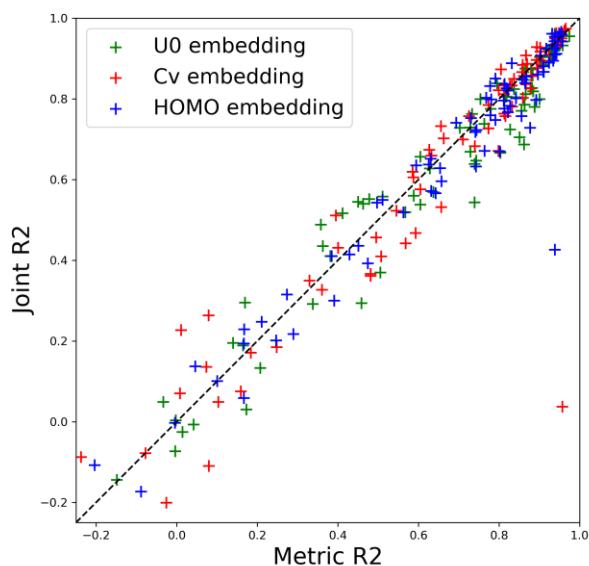

**Figure S3.** R2 score comparison of Joint and Metric VAEs (our proposed model) broken down by RDKit descriptors and embedding labels. Each dot represents RDKit descriptors, while each marker color represents a physical property value used in the embedding learning model.

■ Section 3. Details on computer setup and CPU and GPU specifications and computational times.

● OS

Ubuntu 16.04.6 LTS

● CPU

product: Intel(R) Xeon(R) CPU E5-1650 v4 @ 3.60GHz

vendor: Intel Corp.

size: 3599MHz

capacity: 4GHz

width: 64 bits

● GPU

product : GP104 [GeForce GTX 1080]

vendor : NVIDIA Corporation

This code for this study was tested in Python 3.6.6 with Pytorch 0.4.1.

● Computational time with GPU

| <b>Mode</b>               | <b>Sample size</b> | <b>Batch size</b> | <b>Epoch time</b> |
|---------------------------|--------------------|-------------------|-------------------|
| Train                     | 99968              | 64                | 3002.102 (sec)    |
| Validation<br>(inference) | 28928              | 64                | 578.184 (sec)     |
